# Supplementary material for: The PACAP-derived peptide MPAPO facilitates corneal wound healing by promoting corneal epithelial cell proliferation and trigeminal ganglion cell axon regeneration
Source: PubMed Central journal article supplement (PMC6854382; doi:10.7150/ijbs.35630), 2019-10-15
Supplement: ijbsv15p2676s1.pdf [file ijbsv15p2676s1.pdf]

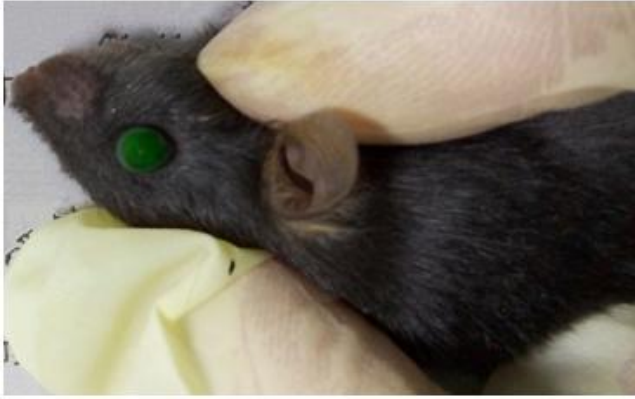

Supplementary Figure 1. Mouse cornea after injury. After sodium fluorescein staining, it was washed with physiological saline. A round green area formed in the middle of the mouse eyeball was the cornea of the injured mouse eye, and uniform staining was observed.

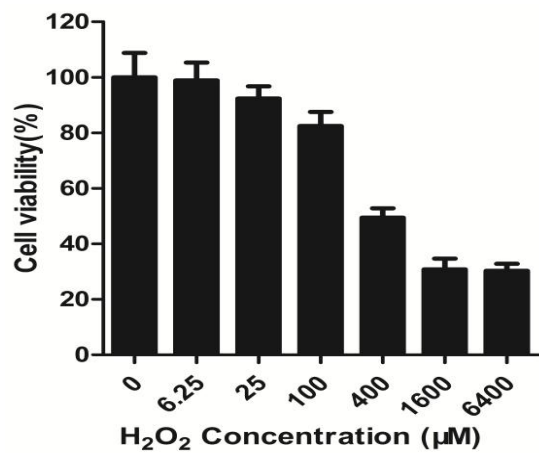

Supplementary Figure 2. A corneal epithelial cell injury model was established by treating normal cells with different concentrations (0, 6.25, 25, 100, 400, 1600, and 6400 μM) of H<sub>2</sub>O<sub>2</sub>. The effect of cell injury in low concentration (below 25μM) was not obvious. With the increase of H<sub>2</sub>O<sub>2</sub> concentration, the cell viability decreased sharply, the survival rate was 80% at 100μM, and the survival rate was 50% at 400μM. When the concentration of H<sub>2</sub>O<sub>2</sub> was further increased, the cell viability decreased further. The survival rate of cells at 1.6 mM and 6.4 mM was only about 20%.

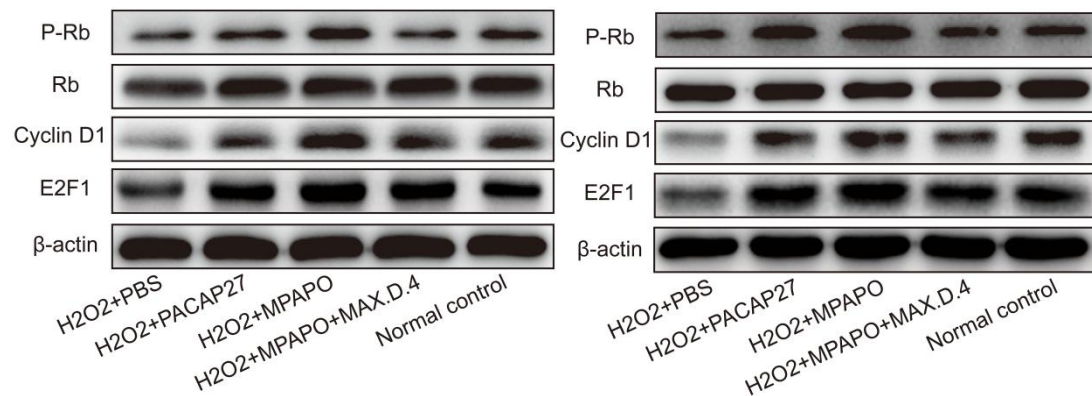

Supplementary Figure 3. Western blotting verified the cyclin D1, E2F1 protein expression and Rb protein phosphorylation..

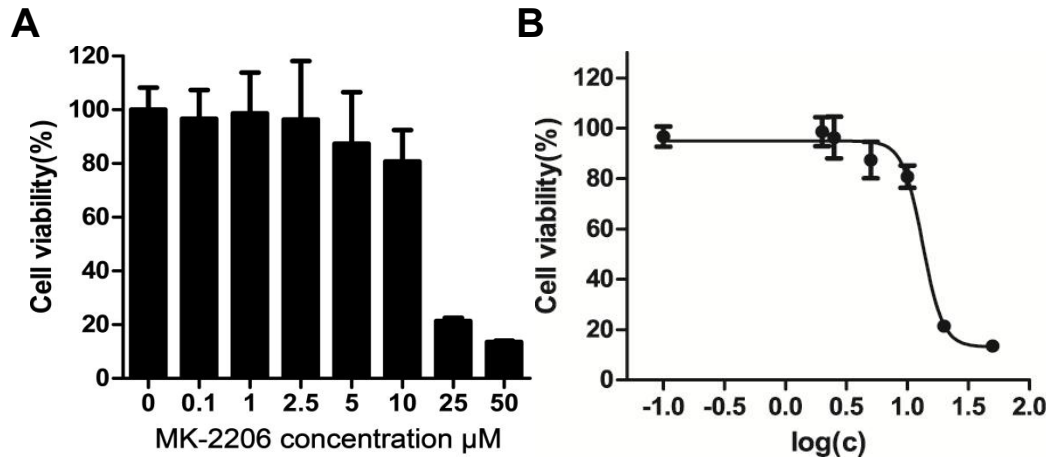

Supplementary Figure 4. MTT assay for the lethal dose of MK-2206 on mouse corneal epithelial cells. (A) When the concentration of MK-2206 reached 50  $\mu\text{M}$ , the cells all died. The cell survival rate from 10 $\mu\text{M}$  to 25 $\mu\text{M}$  decreased from 80% to 20%. (B) According to the results of MTT experiment, the cell survival rate is the ordinate, the logarithm of the base 10 is  $\lg(c)$  as the abscissa, and the  $\text{IC}_{50}$  calculated by curve fitting is 13.8  $\mu\text{M}$ .

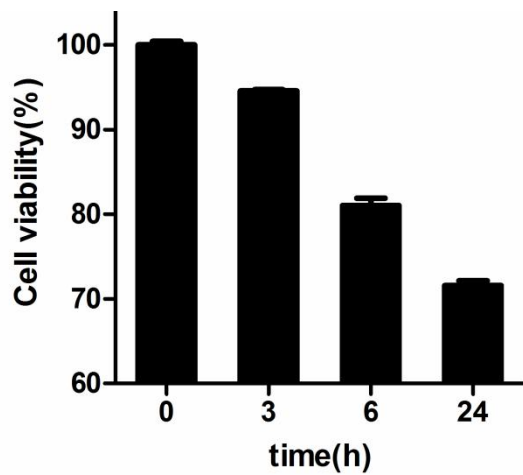

Supplementary Figure 5. MTT assay was used to study the survival rate of cells treated with  $\text{H}_2\text{O}_2$  at 0h, 3h, 6h and 24h. The data showed that the cell survival rate gradually decreased with time after administration, the cell survival rate reached 80% at 6h, and 70% at 24h.

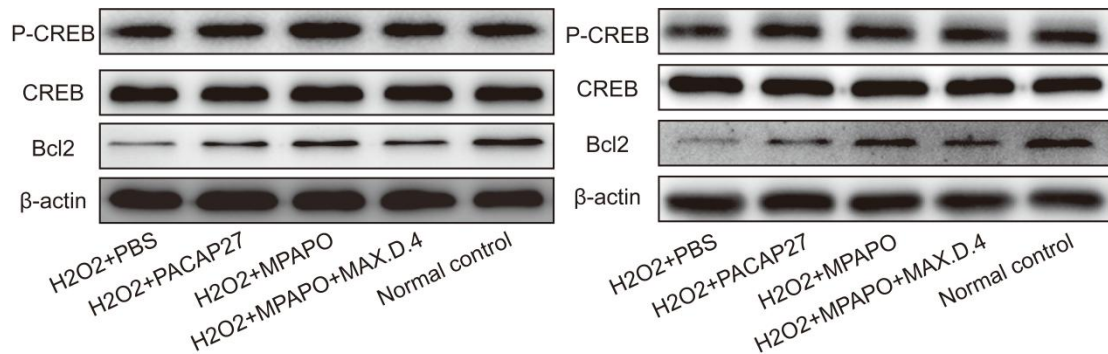

Supplementary Figure 6. Western blotting was used to verify that MPAPO promotes the CREB and Bcl2 proteins expression involved in trigeminal ganglion cell injury repair.
